# Supplementary material
Source: PubMed Central journal article supplement (PMC6645827)
Supplement: ao8b00035_si_001.pdf [file ao8b00035_si_001.pdf]

Supplementary Material

## Therapeutic Radiopharmaceuticals Targeting Integrin $\alpha\beta6$

Stefanie Felicitas Färber†, Alexander Wurzer†, Florian Reichart‡, Roswitha Beck†, Horst Kessler‡, Hans-Jürgen Wester†, Johannes Notni†\*

† Lehrstuhl für Pharmazeutische Radiochemie

Technische Universität München

Walther-Meißner-Str. 3

D-85748 Germany.

email: [johannes.notni@tum.de](mailto:johannes.notni@tum.de)

web: <https://www.prc.ch.tum.de>

‡ Institute for Advanced Study and Center of Integrated Protein Science (CIPSM)

Department of Chemistry

Technische Universität München

Germany

**Table S1:** Biodistribution data (% injected dose per gram tissue) of approx. 2 MBq of the  $^{177}\text{Lu}$ -labeled c(avb6)-peptide conjugates in H2009 tumor xenografted SCID mice, 90 min p.i. (all data expressed as mean  $\pm$  SD).

|            | c(avb6)-Trz-DOTPI | c(avb6)-Trz-DOTAGA | c(avb6)-Trz-DOTA | c(avb6)-DOTAGA  | c(avb6)-DOTA    |
|------------|-------------------|--------------------|------------------|-----------------|-----------------|
| <i>n</i>   | 3                 | 5                  | 3                | 4               | 5               |
| Blood      | 0.03 $\pm$ 0.00   | 0.11 $\pm$ 0.03    | 0.11 $\pm$ 0.02  | 0.10 $\pm$ 0.09 | 0.07 $\pm$ 0.04 |
| Heart      | 0.02 $\pm$ 0.00   | 0.07 $\pm$ 0.02    | 0.09 $\pm$ 0.01  | 0.07 $\pm$ 0.03 | 0.08 $\pm$ 0.02 |
| Lung       | 0.20 $\pm$ 0.06   | 0.27 $\pm$ 0.06    | 0.37 $\pm$ 0.06  | 0.33 $\pm$ 0.11 | 0.28 $\pm$ 0.10 |
| Liver      | 0.07 $\pm$ 0.01   | 0.24 $\pm$ 0.11    | 0.35 $\pm$ 0.04  | 0.17 $\pm$ 0.02 | 0.21 $\pm$ 0.07 |
| Spleen     | 0.08 $\pm$ 0.02   | 0.17 $\pm$ 0.06    | 0.11 $\pm$ 0.04  | 0.14 $\pm$ 0.02 | 0.12 $\pm$ 0.02 |
| Pancreas   | 0.02 $\pm$ 0.00   | 0.05 $\pm$ 0.01    | 0.06 $\pm$ 0.02  | 0.05 $\pm$ 0.02 | 0.06 $\pm$ 0.03 |
| Stomach    | 0.25 $\pm$ 0.02   | 0.54 $\pm$ 0.05    | 0.74 $\pm$ 0.07  | 0.67 $\pm$ 0.17 | 0.68 $\pm$ 0.16 |
| Small int. | 0.17 $\pm$ 0.02   | 0.25 $\pm$ 0.03    | 0.56 $\pm$ 0.38  | 0.36 $\pm$ 0.10 | 0.35 $\pm$ 0.07 |
| Large int. | 0.17 $\pm$ 0.01   | 0.26 $\pm$ 0.07    | 0.36 $\pm$ 0.03  | 0.43 $\pm$ 0.14 | 0.45 $\pm$ 0.12 |
| Kidneys    | 13.67 $\pm$ 3.94  | 4.66 $\pm$ 1.12    | 3.36 $\pm$ 0.37  | 5.39 $\pm$ 0.63 | 4.23 $\pm$ 0.59 |
| Adrenals   | 0.02 $\pm$ 0.03   | 0.12 $\pm$ 0.06    | 0.00 $\pm$ 0.00  | 0.10 $\pm$ 0.04 | 0.10 $\pm$ 0.05 |
| Muscle     | 0.04 $\pm$ 0.04   | 0.04 $\pm$ 0.01    | 0.04 $\pm$ 0.00  | 0.05 $\pm$ 0.02 | 0.05 $\pm$ 0.01 |
| Eye        | 0.06 $\pm$ 0.01   | 0.15 $\pm$ 0.03    | 0.13 $\pm$ 0.01  | 0.11 $\pm$ 0.02 | 0.14 $\pm$ 0.05 |
| Tumor      | 0.18 $\pm$ 0.02   | 0.74 $\pm$ 0.15    | 0.50 $\pm$ 0.38  | 0.73 $\pm$ 0.28 | 0.64 $\pm$ 0.26 |

**Table S2:** Tumor-to-organ/tissue ratios for biodistribution data shown in Table S1 (all data expressed as mean  $\pm$  SD).

|            | c(avb6)-Trz-DOTPI | c(avb6)-Trz-DOTAGA | c(avb6)-Trz-DOTA | c(avb6)-DOTAGA | c(avb6)-DOTA   |
|------------|-------------------|--------------------|------------------|----------------|----------------|
| Blood      | 5.1 $\pm$ 0.4     | 7.0 $\pm$ 1.6      | 4.4 $\pm$ 2.8    | 10.4 $\pm$ 5.7 | 9.6 $\pm$ 3.3  |
| Heart      | 8.2 $\pm$ 2.6     | 10.5 $\pm$ 2.6     | 5.6 $\pm$ 3.9    | 11.6 $\pm$ 4.1 | 8.2 $\pm$ 1.4  |
| Lung       | 1.0 $\pm$ 0.4     | 2.8 $\pm$ 0.2      | 1.3 $\pm$ 0.8    | 2.5 $\pm$ 1.5  | 2.5 $\pm$ 1.2  |
| Liver      | 2.6 $\pm$ 0.6     | 3.5 $\pm$ 1.1      | 1.4 $\pm$ 0.9    | 4.3 $\pm$ 1.5  | 3.0 $\pm$ 0.6  |
| Spleen     | 2.2 $\pm$ 0.4     | 4.6 $\pm$ 1.1      | 5.3 $\pm$ 5.3    | 5.6 $\pm$ 2.7  | 5.2 $\pm$ 1.6  |
| Pancreas   | 10.6 $\pm$ 1.9    | 15.5 $\pm$ 2.6     | 8.1 $\pm$ 4.1    | 16.7 $\pm$ 4.9 | 12.9 $\pm$ 5.6 |
| Stomach    | 0.7 $\pm$ 0.0     | 1.4 $\pm$ 0.2      | 0.6 $\pm$ 0.4    | 1.1 $\pm$ 0.4  | 0.9 $\pm$ 0.3  |
| Small int. | 1.1 $\pm$ 0.0     | 3.0 $\pm$ 0.7      | 1.4 $\pm$ 1.6    | 2.1 $\pm$ 0.8  | 1.9 $\pm$ 0.7  |
| Large int. | 1.0 $\pm$ 0.2     | 3.0 $\pm$ 0.9      | 1.3 $\pm$ 0.9    | 2.0 $\pm$ 1.1  | 1.5 $\pm$ 0.6  |
| Kidneys    | 0.0 $\pm$ 0.0     | 0.2 $\pm$ 0.0      | 0.2 $\pm$ 0.1    | 0.1 $\pm$ 0.0  | 0.1 $\pm$ 0.0  |
| Adrenals   | n.d.              | 9.5 $\pm$ 8.0      | n.d.             | 7.6 $\pm$ 1.8  | 8.1 $\pm$ 4.5  |
| Muscle     | 8.6 $\pm$ 8.6     | 17.0 $\pm$ 2.5     | 11.9 $\pm$ 8.9   | 15.5 $\pm$ 4.7 | 11.5 $\pm$ 2.2 |
| Eye        | 3.0 $\pm$ 0.2     | 5.0 $\pm$ 1.4      | 3.9 $\pm$ 2.8    | 7.1 $\pm$ 2.7  | 4.6 $\pm$ 0.7  |
